# Supplementary material for: Fluorescent, phosphorescent, magnetic resonance contrast and radioactive tracer labelling of extracellular vesicles
Source: Royal Society of Chemistry journal article supplement (doi:10.1039/d2cs00238h), 2024-01-01

# Fluorescent, Phosphorescent, Magnetic Resonance Contrast and Radioactive Tracer Labelling of Extracellular Vesicles

Kartika Wardhani<sup>a,b</sup>, Aviva Levina<sup>a</sup>, Georges E. R. Grau<sup>c-f</sup>, Peter A. Lay<sup>a-e,g\*</sup>

# Figure 1. Extracellular Vesicle Biogenesis

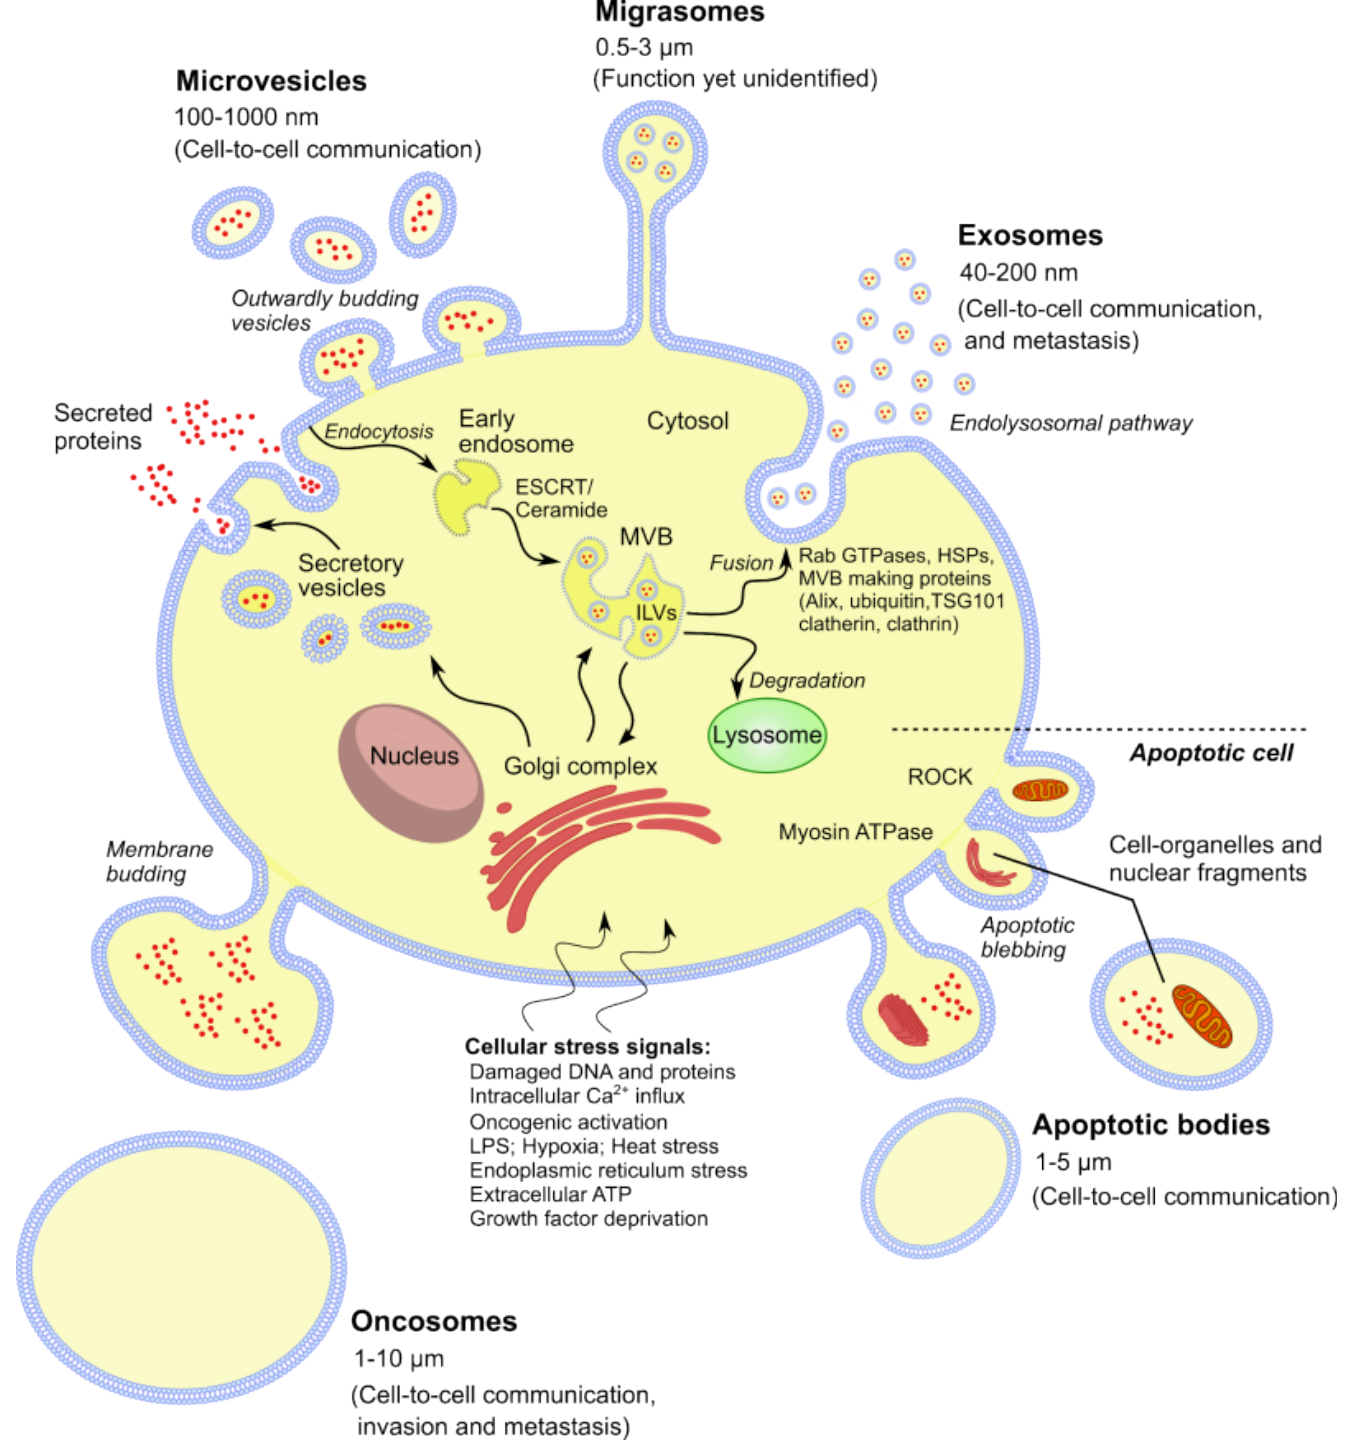

# Figure 2. EV Molecular Composition

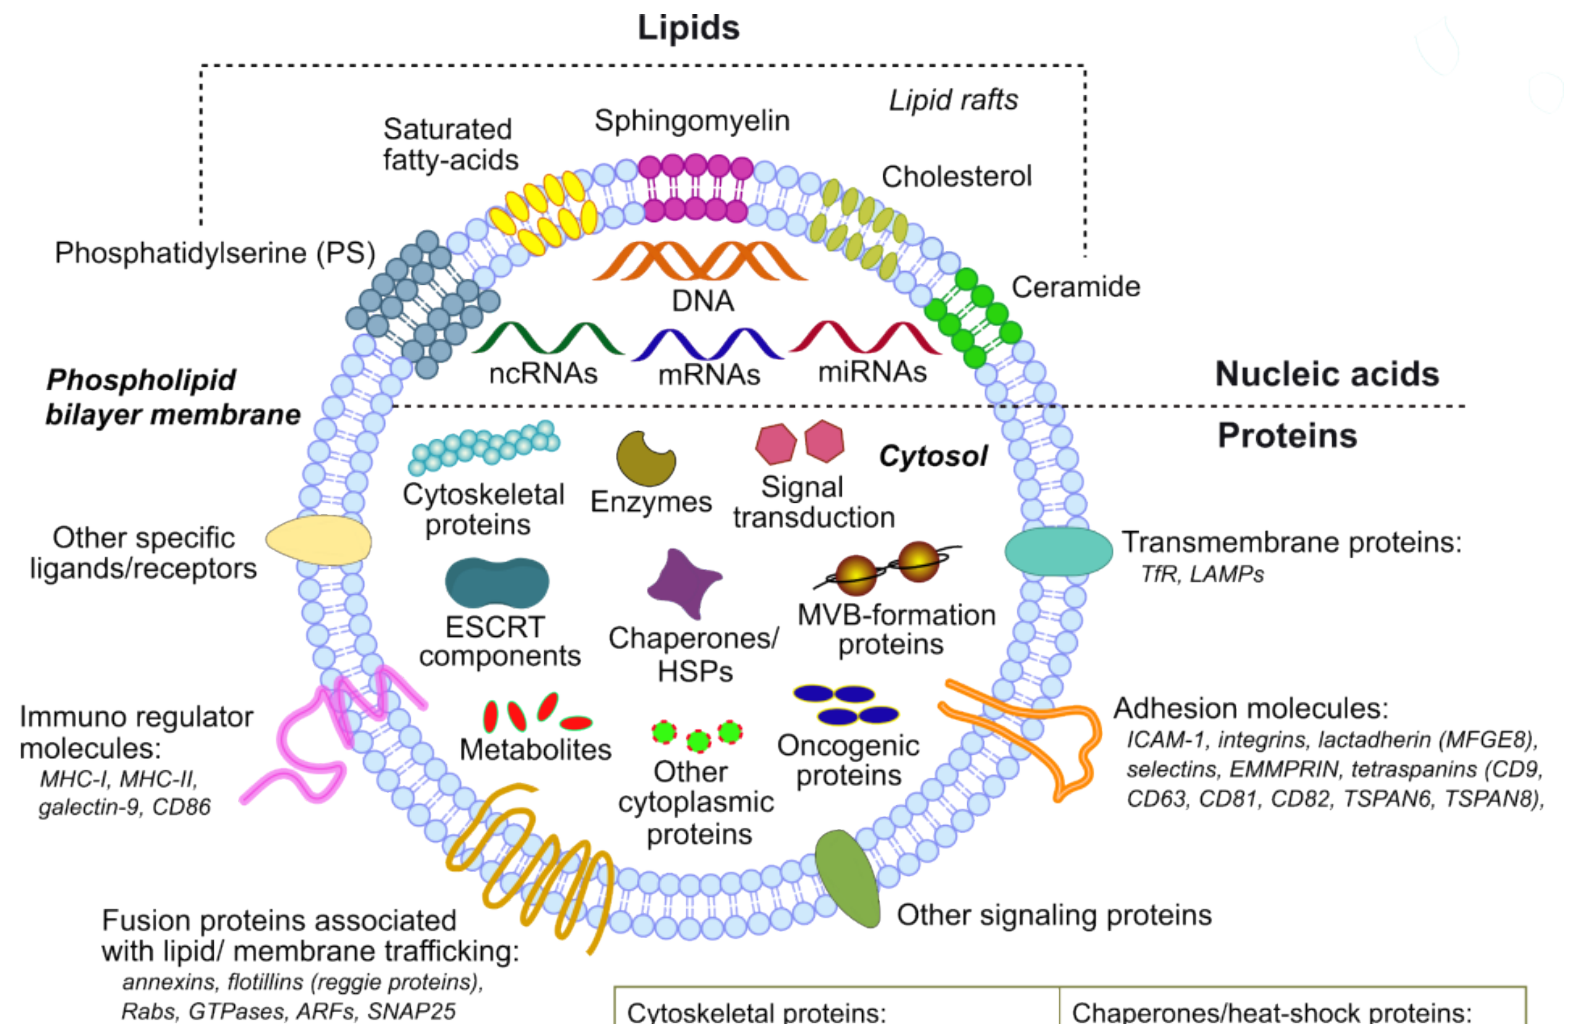

|                                                                                                                                                                                                                                                                                                                                                                                                                                                                                                                                          |                                                                                                                                                                                                                                                                                                                                                                                                                                                                                                                           |
|------------------------------------------------------------------------------------------------------------------------------------------------------------------------------------------------------------------------------------------------------------------------------------------------------------------------------------------------------------------------------------------------------------------------------------------------------------------------------------------------------------------------------------------|---------------------------------------------------------------------------------------------------------------------------------------------------------------------------------------------------------------------------------------------------------------------------------------------------------------------------------------------------------------------------------------------------------------------------------------------------------------------------------------------------------------------------|
| <p><b>Cytoskeletal proteins:</b><br/>actin, myosin, tubulins, moesin, keratins, fibronectin, vimentin, cofilin, DIAPH3, profilin, talin, gelsolin, ezrin</p> <p><b>Enzymes:</b><br/>enolase, ROCKs, GAPDH, ATPase, catalase, PGK1, pyruvate kinase, peroxidases, AChE, elongation factors</p> <p><b>Signal transduction:</b><br/>syntenin, EGFR, G-proteins, PI3K, ARF-1, ARF-6, protein kinase B (Akt), CDC42, <math>\beta</math>-catenin, 14-3-3, MUC1</p> <p><b>ESCRT components:</b><br/>VPS4, VPS28, ESCRT-0, -I, -II, and -III</p> | <p><b>Chaperones/heat-shock proteins:</b><br/>HSP60, HSP70, HSC70, HSP84, HSP90 (HSP90AA1)</p> <p><b>MVB-formation proteins:</b><br/>TSG101, alix, clathrin, ubiquitin</p> <p><b>Metabolites:</b><br/>carboxylic acids, peptides, nucleotides, sugars, amino acids, cyclic alcohols, nucleosides, biogenic amines, carnitines</p> <p><b>Oncogenic proteins:</b><br/>K-Ras, EGFRvIII, EpCAM, survivin, MET oncogene (HGFR), FAK</p> <p><b>Other cytoplasmic proteins:</b><br/>histones, proteasome, ribosomal proteins</p> |
|------------------------------------------------------------------------------------------------------------------------------------------------------------------------------------------------------------------------------------------------------------------------------------------------------------------------------------------------------------------------------------------------------------------------------------------------------------------------------------------------------------------------------------------|---------------------------------------------------------------------------------------------------------------------------------------------------------------------------------------------------------------------------------------------------------------------------------------------------------------------------------------------------------------------------------------------------------------------------------------------------------------------------------------------------------------------------|

Figure 3. EV-Mediated Intercellular Communication

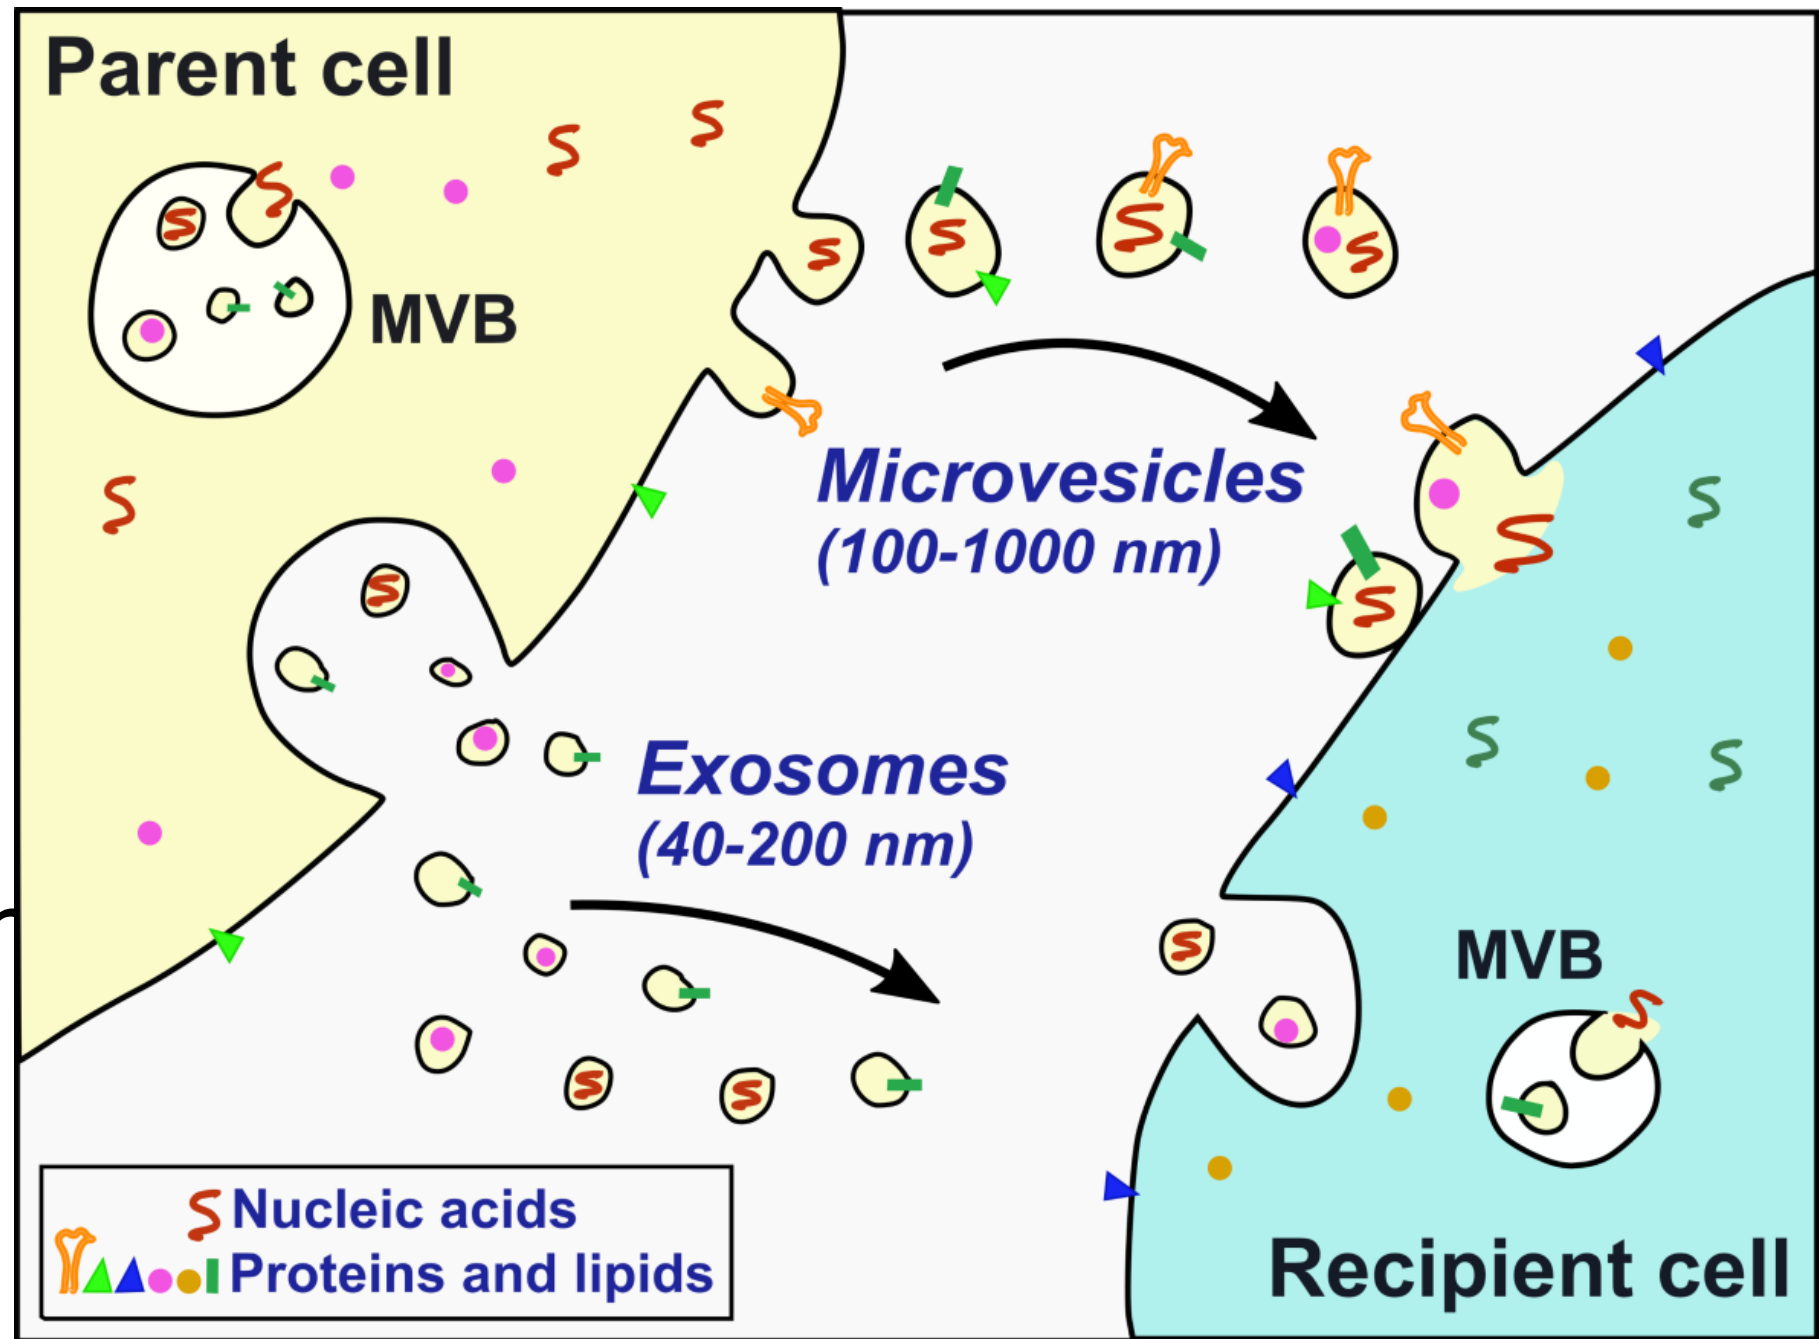

Figure 4. Indirect Labelling of EVs

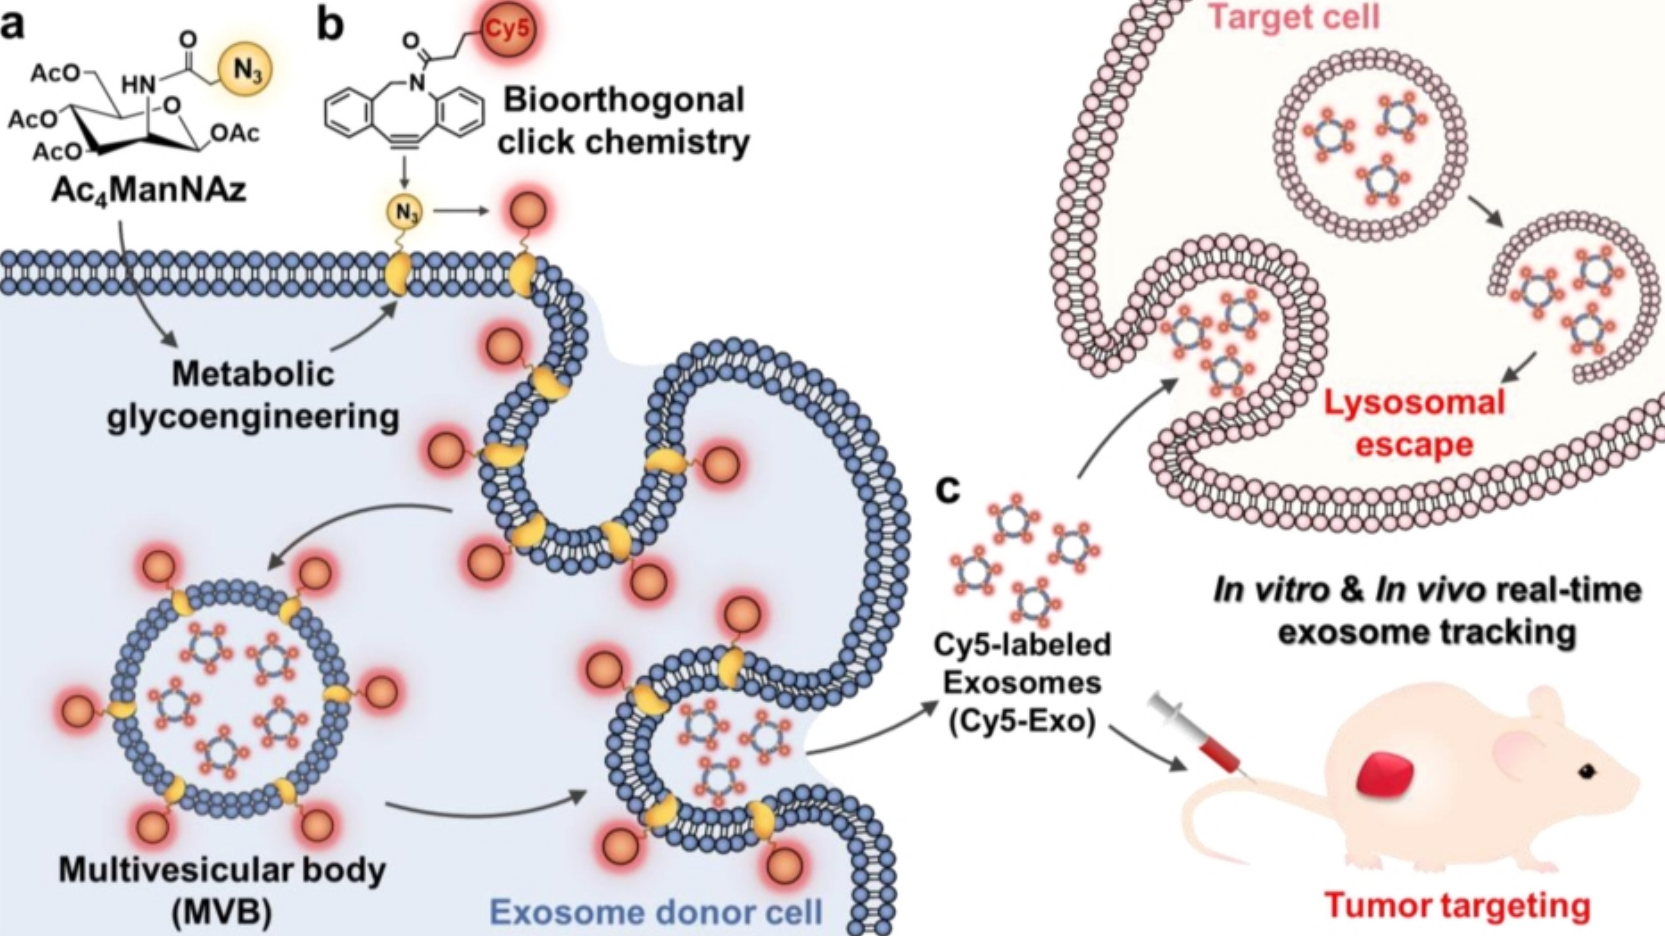

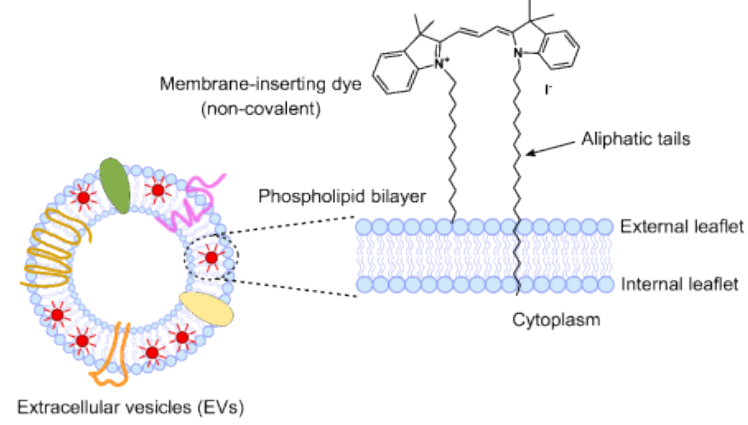

**EV Membrane Labelling (Staining) by Lipophilic Dyes**

**Lipophilic fluorescent dyes**

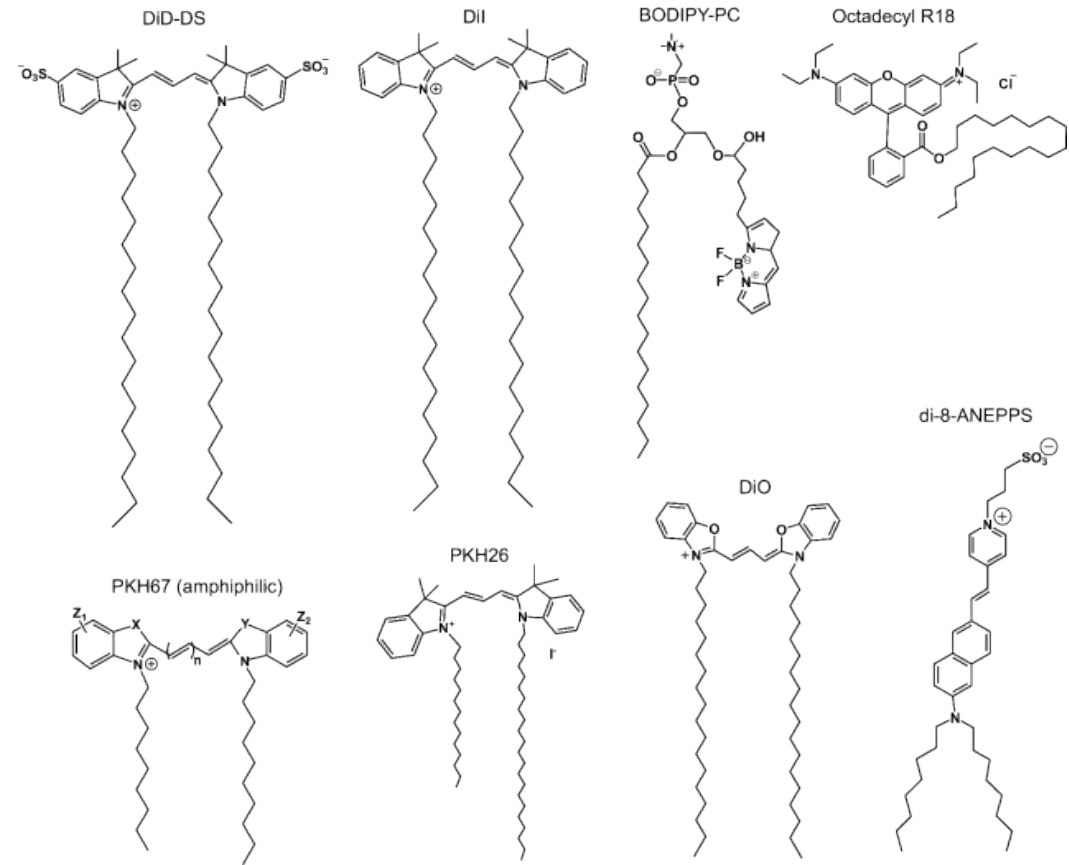

**Figure 5. EV Membrane Labelling by Lipophilic Dyes**

 Lipophilic fluorescent dyes

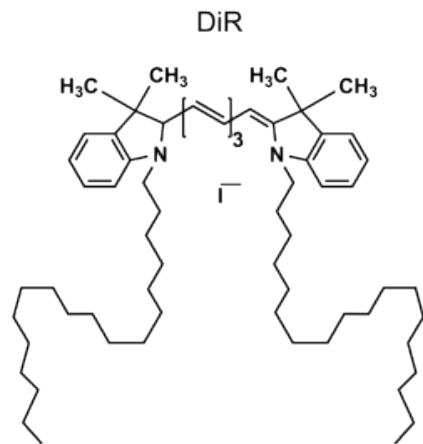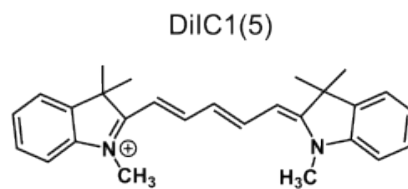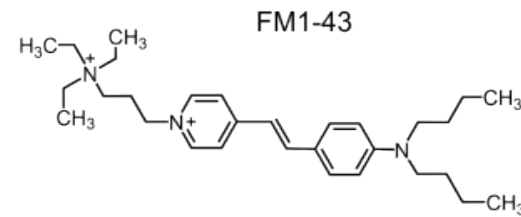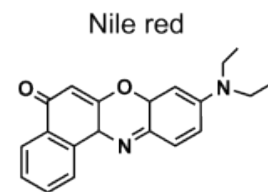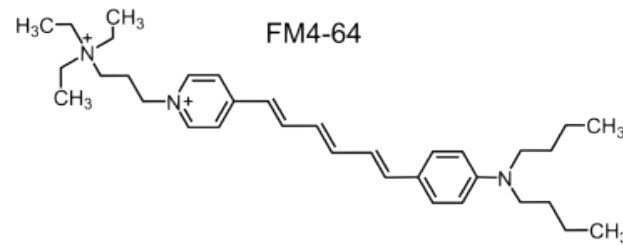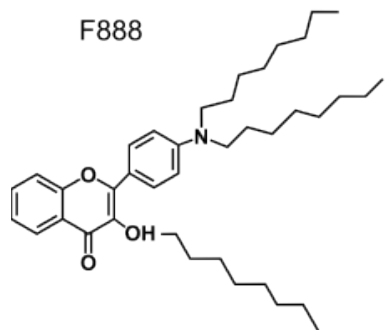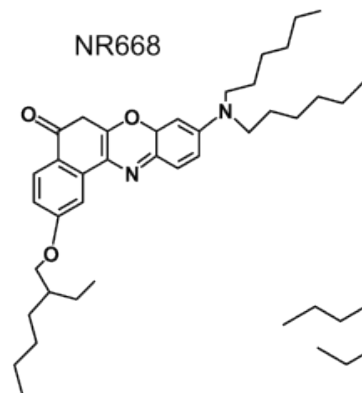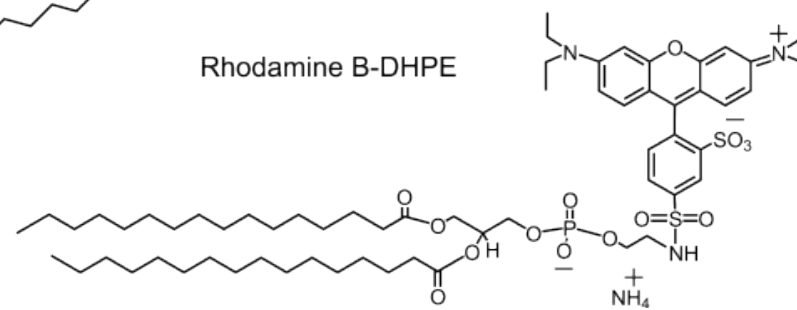

BODIPY-PC

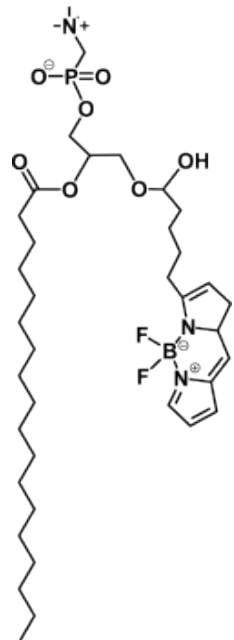

di-8-ANEPPS

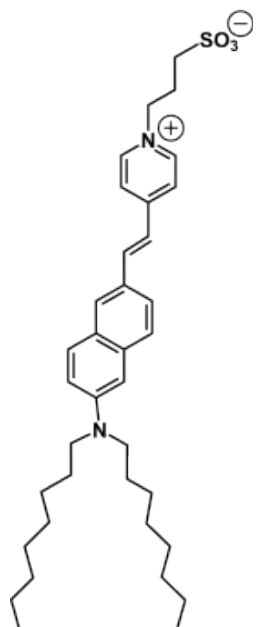

DiD-DS

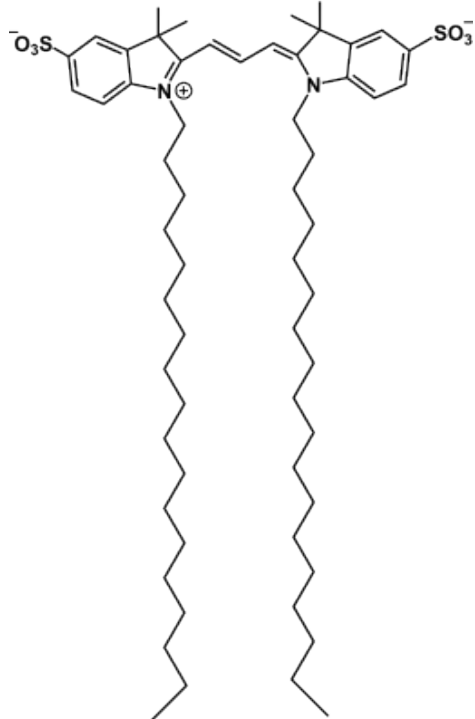

Dil

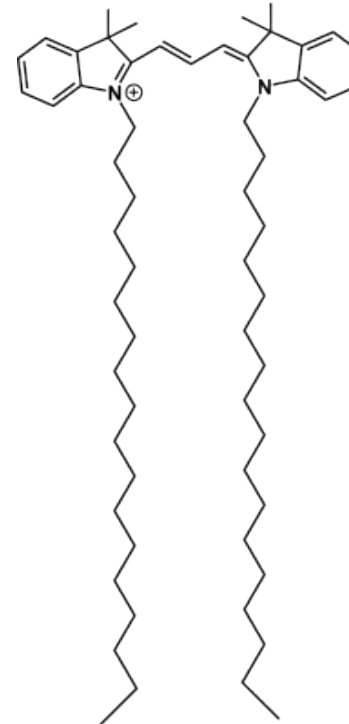

DiO

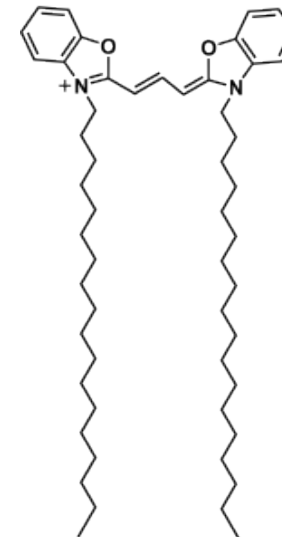

DiIC1(5)

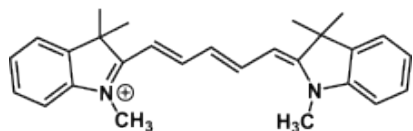

FM4-64

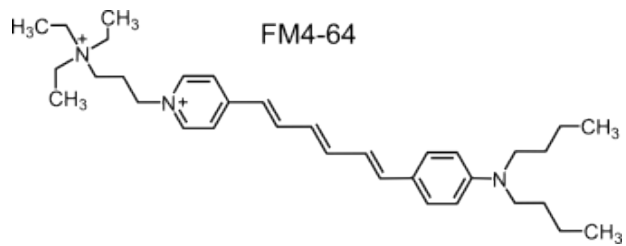

Nile red

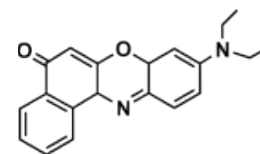

FM1-43

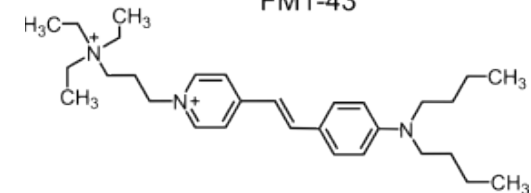



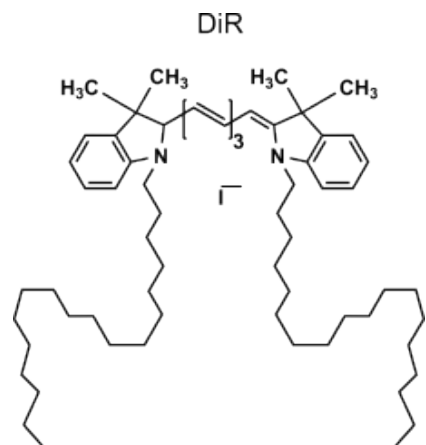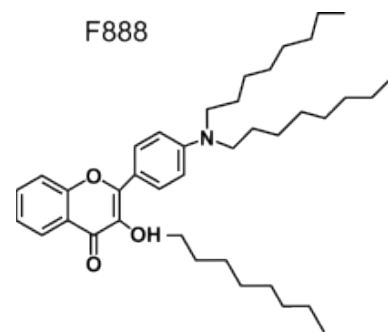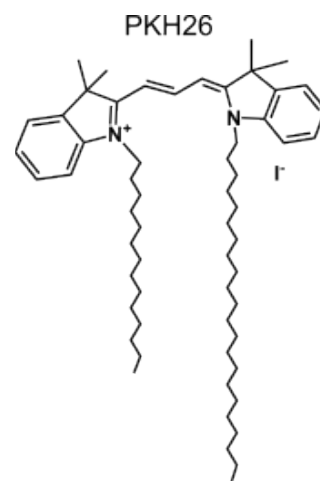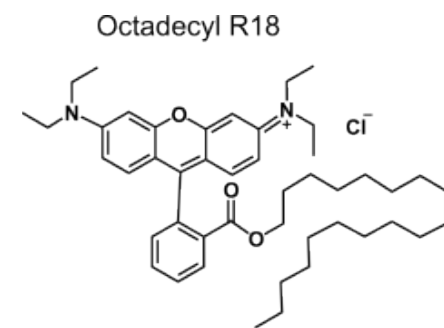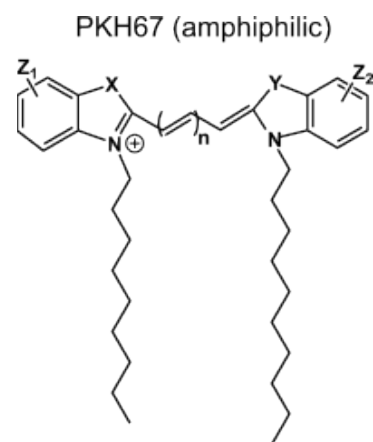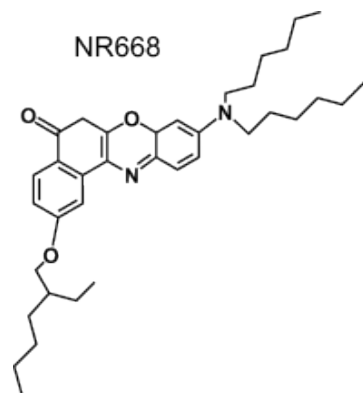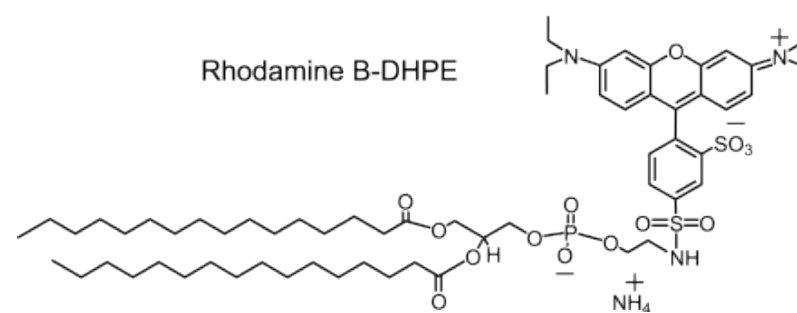

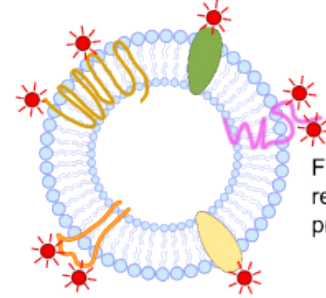

Fluorescent proteins conjugated with reactive chemical moieties to covalently label proteins of interest present on the EV surface

Extracellular vesicles (EVs)

### EV Surface Protein Labelling

 Fluorescent proteins

Green and red fluorescent protein (GFP and RFP)

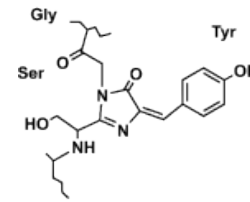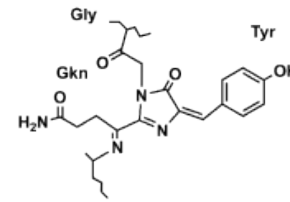

NHS-Fluorescein

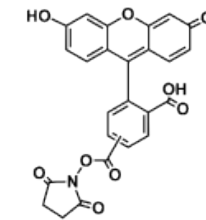

FITC

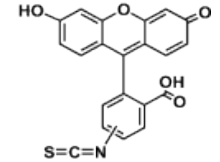

TAMRA NHS ester, 5-isomer (amine-reactive TAMRA-NHS)

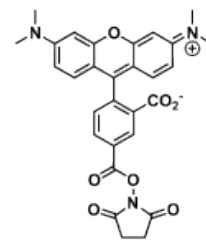

Alexa488-maleimide

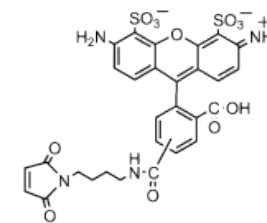

Alexa 488 succinimidyl ester

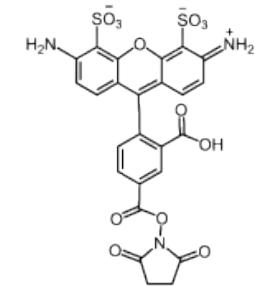

BODIPY TMR C5-maleimide

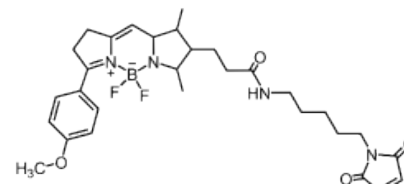

Phycocerythrin

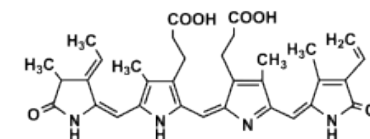

# Figure 6. EV Surface Protein Labelling

Alexa 488 succinimidyl ester

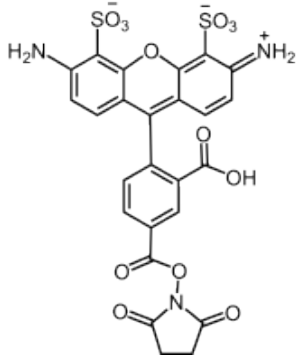

Alexa488-maleimide

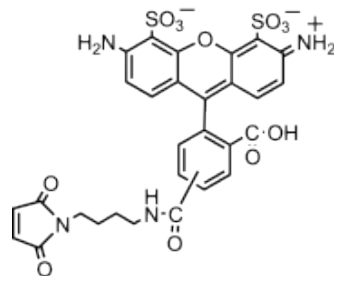

BODIPY TMR C5-maleimide

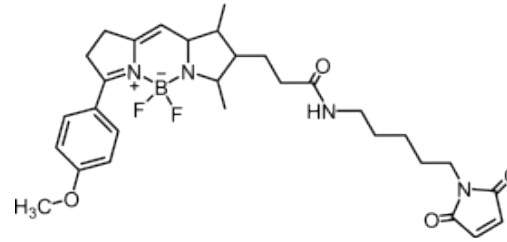

FITC

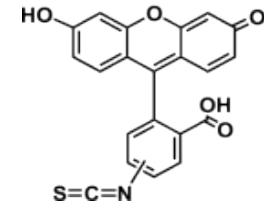

Green and red fluorescent protein (GFP and RFP)

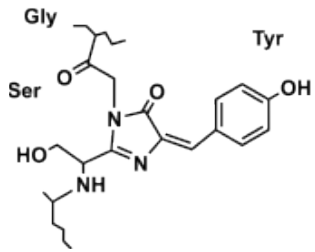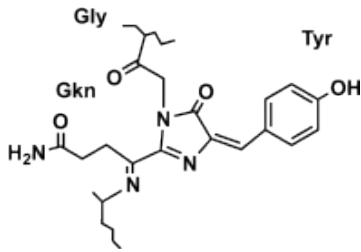

NHS-Fluorescein

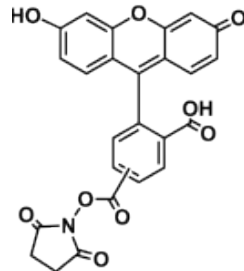

Phycocerythrin

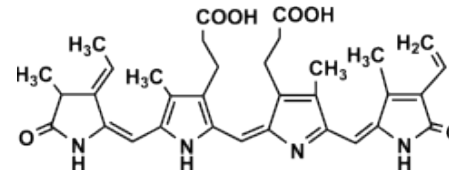

TAMRA NHS ester, 5-isomer (amine-reactive TAMRA-NHS)

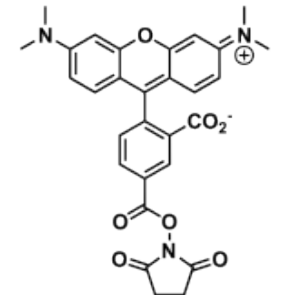

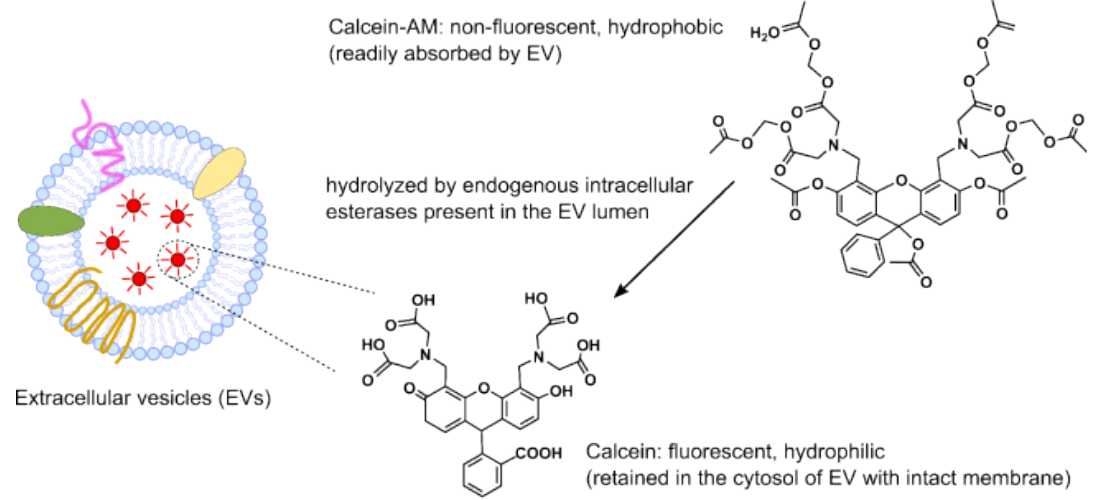

### EV Luminal labelling

#### ☀ Membrane-permeant fluorescent dyes

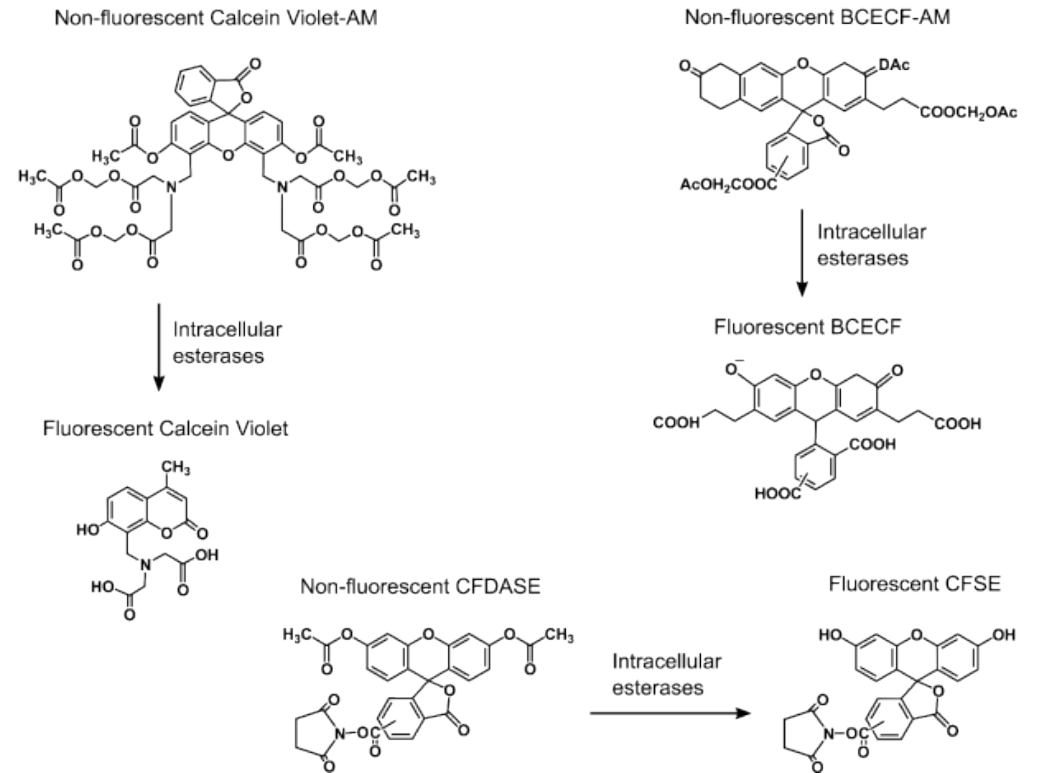

Figure 7. Luminal Labelling by Membrane-Permeant Dyes

Non-fluorescent Calcein Violet-AM

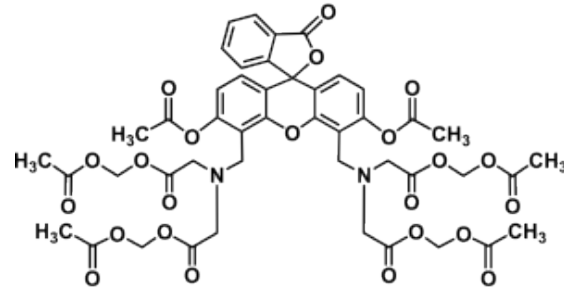

Intracellular  
esterases

Fluorescent Calcein Violet

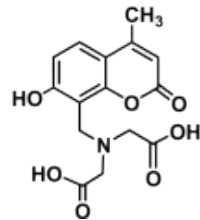

Non-fluorescei

Non-fluorescent BCECF-AM

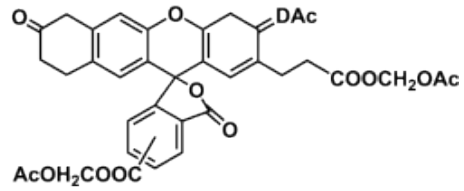

Intracellular  
esterases

Fluorescent BCECF

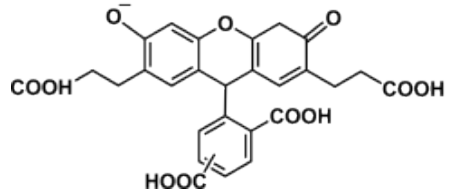

Non-fluorescent CFDASE

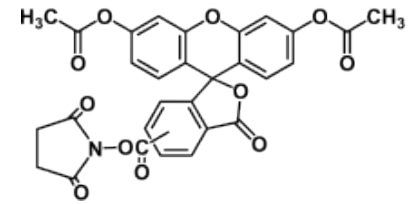

Intracellular  
esterases

Fluorescent CFSE

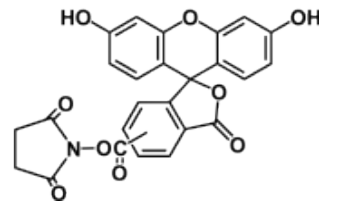

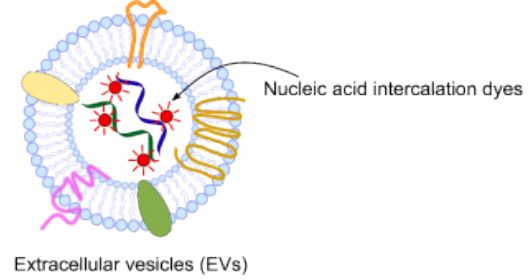

**Fluorescent labelling of nucleic acid molecules within EV**

**☀ Nucleic acid fluorescent dyes**

# Figure 8. Labelling of Nucleic Acids within Extracellular Vesicles

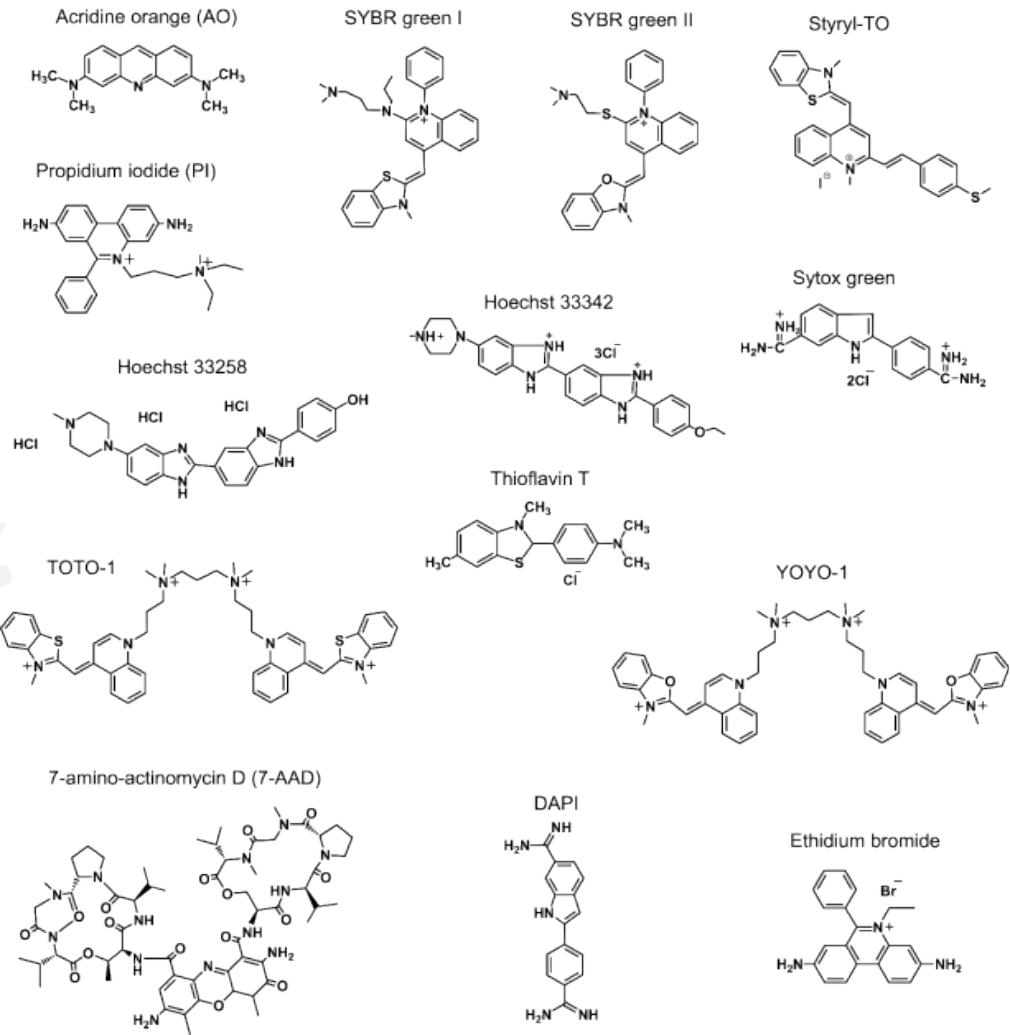



# Figure 9. Wardhani et al. Study

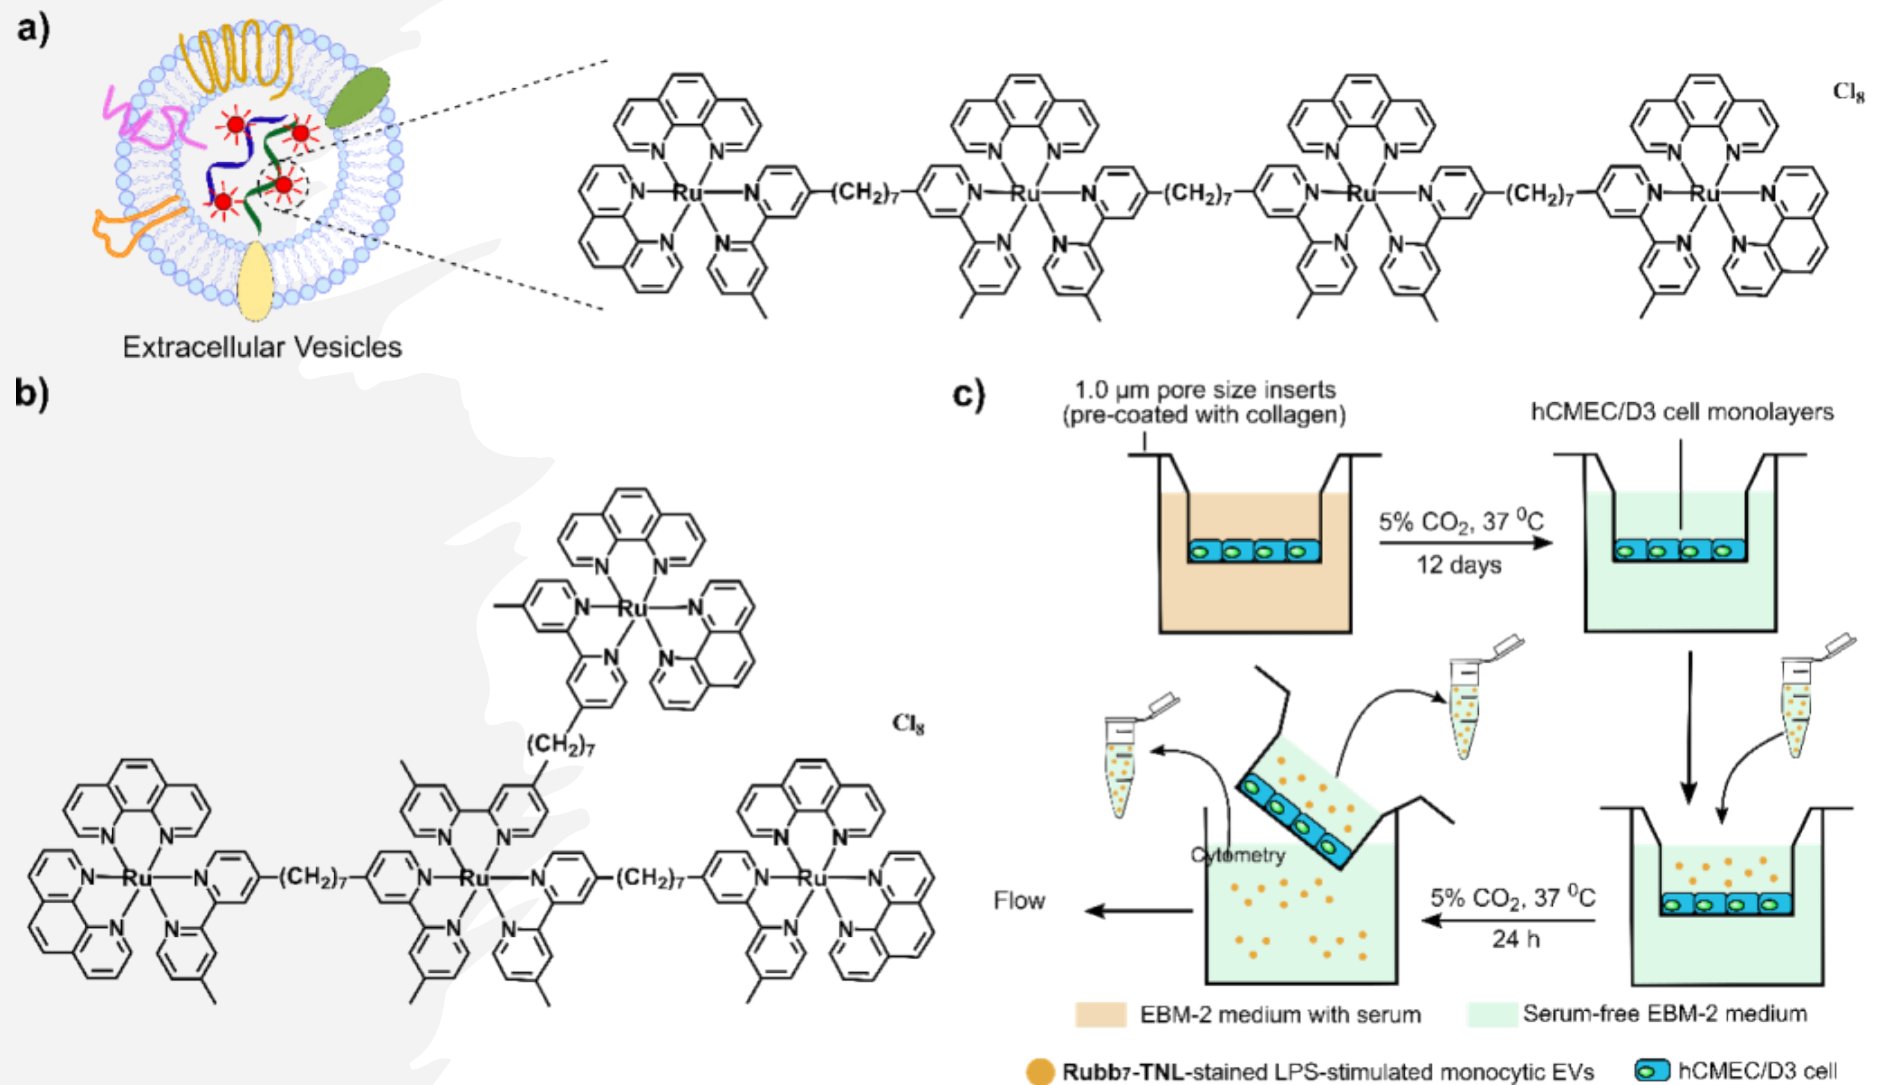



# Figure 10. EV- Blood Brain Barrier Study

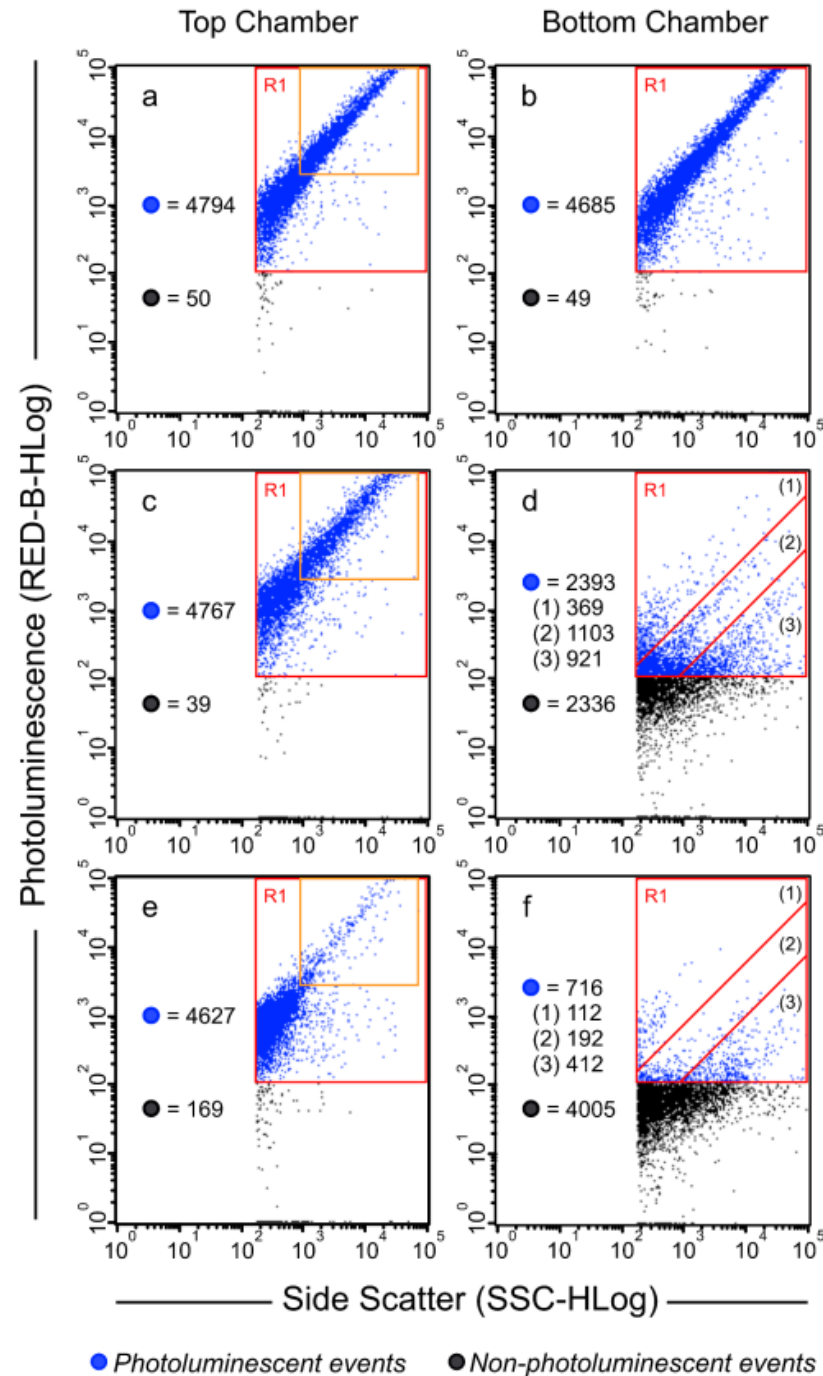

TOC -  
Peter A. Lay -  
ChemSocRev

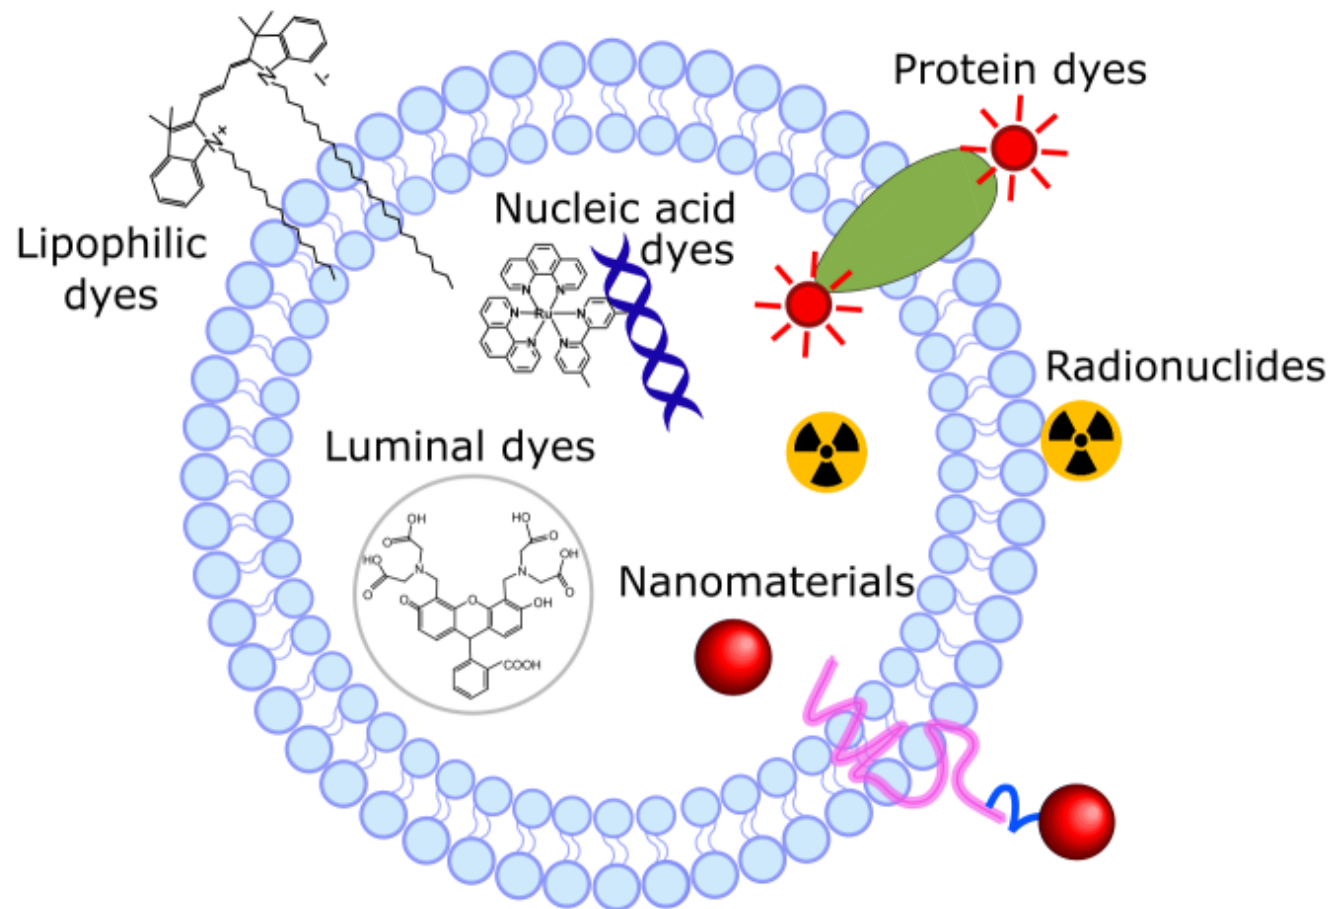

Supplement: d2cs00238h1.pdf [file d2cs00238h1.pdf]
